# Supplementary material for: Molecular and physiological mechanisms associated with root exposure to mercury in barley
Source: Royal Society of Chemistry journal article supplement (doi:10.1039/c3mt00084b), 2013-01-01
Supplement: c3mt00084b_2.pdf [file c3mt00084b_2.pdf]

# 1 - cysteine endopeptidase (EC 3.4.22.-) precursor - castor bean gb|AAC62396.1| cysteine endopeptidase precursor [Ricinus communis]

Details for BARLEY1:CONTIG5626\_S\_AT  
 Full Screen

NetAffx Links [Cluster Members](#)  
[Consensus/Exemplar](#)  
[Group Members](#)

## GeneChip Array Information

Probe Set ID Contig5626\_s\_at  
 GeneChip Array Affymetrix Barley Genome Array  
 Organism Name Barley

## Probe Design Information

Transcript ID(Array Design) Contig5626  
 Sequence Type Exemplar sequence  
 Representative Public ID Contig5626 [NCBI](#)  
 Target Description BEST BLASTX NR: 10/29/02 T08122 1e-74 cysteine endopeptidase (EC 3.4.22.-) precursor - castor bean gb|AAC62396.1| cysteine endopeptidase precursor [Ricinus communis]

## Annotation Method Description

Annotation Description Contig5626\_s\_at was annotated using the Design Representative Id based pipeline to a UniGene identifier using 1 transcript(s).

Annotation Grade This is a grade R annotation.

Annotation Transcript Cluster (# of Matching Probes) Contig5626

| Transcript | Representative Transcript | Description | Matching Probes | Related Probesets by Grade |
|------------|---------------------------|-------------|-----------------|----------------------------|
|------------|---------------------------|-------------|-----------------|----------------------------|

| <b>Assignments</b>         | Contig5626                                                                                                                                                                                                                                                                                                                                                                                                                                                                                                                                                                                                                                                                                                                                                                                                                                                                                                                                                                                                                                                                                                                                                                                                                                                                                                                                                                                           | None                  |                              |                     |                              |                     |                           |     |     |     |           |                           |     |     |     |           |                          |     |     |     |           |                           |     |     |     |           |                           |     |     |     |           |                            |     |     |     |           |                           |     |     |     |           |                           |     |     |     |           |                           |     |     |     |           |                           |     |     |     |           |                           |     |     |     |           |  |
|----------------------------|------------------------------------------------------------------------------------------------------------------------------------------------------------------------------------------------------------------------------------------------------------------------------------------------------------------------------------------------------------------------------------------------------------------------------------------------------------------------------------------------------------------------------------------------------------------------------------------------------------------------------------------------------------------------------------------------------------------------------------------------------------------------------------------------------------------------------------------------------------------------------------------------------------------------------------------------------------------------------------------------------------------------------------------------------------------------------------------------------------------------------------------------------------------------------------------------------------------------------------------------------------------------------------------------------------------------------------------------------------------------------------------------------|-----------------------|------------------------------|---------------------|------------------------------|---------------------|---------------------------|-----|-----|-----|-----------|---------------------------|-----|-----|-----|-----------|--------------------------|-----|-----|-----|-----------|---------------------------|-----|-----|-----|-----------|---------------------------|-----|-----|-----|-----------|----------------------------|-----|-----|-----|-----------|---------------------------|-----|-----|-----|-----------|---------------------------|-----|-----|-----|-----------|---------------------------|-----|-----|-----|-----------|---------------------------|-----|-----|-----|-----------|---------------------------|-----|-----|-----|-----------|--|
| <b>Annotation Notes</b>    | There are no noteworthy cross hybridizing mRNAs found for this probe set.                                                                                                                                                                                                                                                                                                                                                                                                                                                                                                                                                                                                                                                                                                                                                                                                                                                                                                                                                                                                                                                                                                                                                                                                                                                                                                                            |                       |                              |                     |                              |                     |                           |     |     |     |           |                           |     |     |     |           |                          |     |     |     |           |                           |     |     |     |           |                           |     |     |     |           |                            |     |     |     |           |                           |     |     |     |           |                           |     |     |     |           |                           |     |     |     |           |                           |     |     |     |           |                           |     |     |     |           |  |
| <b>Sequence</b>            |                                                                                                                                                                                                                                                                                                                                                                                                                                                                                                                                                                                                                                                                                                                                                                                                                                                                                                                                                                                                                                                                                                                                                                                                                                                                                                                                                                                                      |                       |                              |                     |                              |                     |                           |     |     |     |           |                           |     |     |     |           |                          |     |     |     |           |                           |     |     |     |           |                           |     |     |     |           |                            |     |     |     |           |                           |     |     |     |           |                           |     |     |     |           |                           |     |     |     |           |                           |     |     |     |           |                           |     |     |     |           |  |
| <b>Target Sequence</b>     | >BARLEY1:CONTIG5626_S_AT<br>aacaagaagccgtccgcccgtgggtcaccatcgacgggtatgaggacgtgcccgccaacgacg<br>aaaccgcgctgaagaaggcgggtggctgcacagccagtgccgctggccatcgaggctagc<br>gggtcgcacttccagttctactcggaggggggtgttcgcgggcaagtgcgggacggagctg<br>gaccatggcgtggcggcggtgggggtacggcaccaccgtggacggcaccaagtattggatc<br>gtgaaaaactcatgggggcccggagtggggtgagaagggatacatccgcatgaagcgcgat<br>g                                                                                                                                                                                                                                                                                                                                                                                                                                                                                                                                                                                                                                                                                                                                                                                                                                                                                                                                                                                                                                  |                       |                              |                     |                              |                     |                           |     |     |     |           |                           |     |     |     |           |                          |     |     |     |           |                           |     |     |     |           |                           |     |     |     |           |                            |     |     |     |           |                           |     |     |     |           |                           |     |     |     |           |                           |     |     |     |           |                           |     |     |     |           |                           |     |     |     |           |  |
|                            | <a href="#">BLASTn GenBank NR</a>                                                                                                                                                                                                                                                                                                                                                                                                                                                                                                                                                                                                                                                                                                                                                                                                                                                                                                                                                                                                                                                                                                                                                                                                                                                                                                                                                                    |                       |                              |                     |                              |                     |                           |     |     |     |           |                           |     |     |     |           |                          |     |     |     |           |                           |     |     |     |           |                           |     |     |     |           |                            |     |     |     |           |                           |     |     |     |           |                           |     |     |     |           |                           |     |     |     |           |                           |     |     |     |           |                           |     |     |     |           |  |
| <b>Probe Info</b>          | <table border="1"> <thead> <tr> <th>Probe Sequence(5'-3')</th> <th>Probe X</th> <th>Probe Y</th> <th>Probe Interrogation Position</th> <th>Target Strandedness</th> </tr> </thead> <tbody> <tr> <td>AACAAGAAGCCGTCCGCCGTGGTCA</td> <td>543</td> <td>157</td> <td>483</td> <td>Antisense</td> </tr> <tr> <td>CCGTGGTCACCATCGACGGGTATGA</td> <td>632</td> <td>271</td> <td>499</td> <td>Antisense</td> </tr> <tr> <td>GGTATGAGGACGTGCCGCCAACGA</td> <td>570</td> <td>509</td> <td>517</td> <td>Antisense</td> </tr> <tr> <td>GCCAACGACGAAACCGCGCTGAAGA</td> <td>288</td> <td>281</td> <td>534</td> <td>Antisense</td> </tr> <tr> <td>GAAGAAGGCGGTGGCTGCACAGCCA</td> <td>575</td> <td>343</td> <td>554</td> <td>Antisense</td> </tr> <tr> <td>GCCATCGAGGCTAGCGGGTCCGCACT</td> <td>103</td> <td>285</td> <td>588</td> <td>Antisense</td> </tr> <tr> <td>CTAGCGGGTCGCACTTCCAGTTCTA</td> <td>253</td> <td>211</td> <td>598</td> <td>Antisense</td> </tr> <tr> <td>CACCGTGGACGGCACCAAGTATTGG</td> <td>295</td> <td>125</td> <td>695</td> <td>Antisense</td> </tr> <tr> <td>GTGGACGGCACCAAGTATTGGATCG</td> <td>691</td> <td>475</td> <td>699</td> <td>Antisense</td> </tr> <tr> <td>GTGAGAAGGGATACATCCGCATGAA</td> <td>414</td> <td>479</td> <td>751</td> <td>Antisense</td> </tr> <tr> <td>GGATACATCCGCATGAAGCGCGATG</td> <td>393</td> <td>519</td> <td>759</td> <td>Antisense</td> </tr> </tbody> </table> | Probe Sequence(5'-3') | Probe X                      | Probe Y             | Probe Interrogation Position | Target Strandedness | AACAAGAAGCCGTCCGCCGTGGTCA | 543 | 157 | 483 | Antisense | CCGTGGTCACCATCGACGGGTATGA | 632 | 271 | 499 | Antisense | GGTATGAGGACGTGCCGCCAACGA | 570 | 509 | 517 | Antisense | GCCAACGACGAAACCGCGCTGAAGA | 288 | 281 | 534 | Antisense | GAAGAAGGCGGTGGCTGCACAGCCA | 575 | 343 | 554 | Antisense | GCCATCGAGGCTAGCGGGTCCGCACT | 103 | 285 | 588 | Antisense | CTAGCGGGTCGCACTTCCAGTTCTA | 253 | 211 | 598 | Antisense | CACCGTGGACGGCACCAAGTATTGG | 295 | 125 | 695 | Antisense | GTGGACGGCACCAAGTATTGGATCG | 691 | 475 | 699 | Antisense | GTGAGAAGGGATACATCCGCATGAA | 414 | 479 | 751 | Antisense | GGATACATCCGCATGAAGCGCGATG | 393 | 519 | 759 | Antisense |  |
| Probe Sequence(5'-3')      | Probe X                                                                                                                                                                                                                                                                                                                                                                                                                                                                                                                                                                                                                                                                                                                                                                                                                                                                                                                                                                                                                                                                                                                                                                                                                                                                                                                                                                                              | Probe Y               | Probe Interrogation Position | Target Strandedness |                              |                     |                           |     |     |     |           |                           |     |     |     |           |                          |     |     |     |           |                           |     |     |     |           |                           |     |     |     |           |                            |     |     |     |           |                           |     |     |     |           |                           |     |     |     |           |                           |     |     |     |           |                           |     |     |     |           |                           |     |     |     |           |  |
| AACAAGAAGCCGTCCGCCGTGGTCA  | 543                                                                                                                                                                                                                                                                                                                                                                                                                                                                                                                                                                                                                                                                                                                                                                                                                                                                                                                                                                                                                                                                                                                                                                                                                                                                                                                                                                                                  | 157                   | 483                          | Antisense           |                              |                     |                           |     |     |     |           |                           |     |     |     |           |                          |     |     |     |           |                           |     |     |     |           |                           |     |     |     |           |                            |     |     |     |           |                           |     |     |     |           |                           |     |     |     |           |                           |     |     |     |           |                           |     |     |     |           |                           |     |     |     |           |  |
| CCGTGGTCACCATCGACGGGTATGA  | 632                                                                                                                                                                                                                                                                                                                                                                                                                                                                                                                                                                                                                                                                                                                                                                                                                                                                                                                                                                                                                                                                                                                                                                                                                                                                                                                                                                                                  | 271                   | 499                          | Antisense           |                              |                     |                           |     |     |     |           |                           |     |     |     |           |                          |     |     |     |           |                           |     |     |     |           |                           |     |     |     |           |                            |     |     |     |           |                           |     |     |     |           |                           |     |     |     |           |                           |     |     |     |           |                           |     |     |     |           |                           |     |     |     |           |  |
| GGTATGAGGACGTGCCGCCAACGA   | 570                                                                                                                                                                                                                                                                                                                                                                                                                                                                                                                                                                                                                                                                                                                                                                                                                                                                                                                                                                                                                                                                                                                                                                                                                                                                                                                                                                                                  | 509                   | 517                          | Antisense           |                              |                     |                           |     |     |     |           |                           |     |     |     |           |                          |     |     |     |           |                           |     |     |     |           |                           |     |     |     |           |                            |     |     |     |           |                           |     |     |     |           |                           |     |     |     |           |                           |     |     |     |           |                           |     |     |     |           |                           |     |     |     |           |  |
| GCCAACGACGAAACCGCGCTGAAGA  | 288                                                                                                                                                                                                                                                                                                                                                                                                                                                                                                                                                                                                                                                                                                                                                                                                                                                                                                                                                                                                                                                                                                                                                                                                                                                                                                                                                                                                  | 281                   | 534                          | Antisense           |                              |                     |                           |     |     |     |           |                           |     |     |     |           |                          |     |     |     |           |                           |     |     |     |           |                           |     |     |     |           |                            |     |     |     |           |                           |     |     |     |           |                           |     |     |     |           |                           |     |     |     |           |                           |     |     |     |           |                           |     |     |     |           |  |
| GAAGAAGGCGGTGGCTGCACAGCCA  | 575                                                                                                                                                                                                                                                                                                                                                                                                                                                                                                                                                                                                                                                                                                                                                                                                                                                                                                                                                                                                                                                                                                                                                                                                                                                                                                                                                                                                  | 343                   | 554                          | Antisense           |                              |                     |                           |     |     |     |           |                           |     |     |     |           |                          |     |     |     |           |                           |     |     |     |           |                           |     |     |     |           |                            |     |     |     |           |                           |     |     |     |           |                           |     |     |     |           |                           |     |     |     |           |                           |     |     |     |           |                           |     |     |     |           |  |
| GCCATCGAGGCTAGCGGGTCCGCACT | 103                                                                                                                                                                                                                                                                                                                                                                                                                                                                                                                                                                                                                                                                                                                                                                                                                                                                                                                                                                                                                                                                                                                                                                                                                                                                                                                                                                                                  | 285                   | 588                          | Antisense           |                              |                     |                           |     |     |     |           |                           |     |     |     |           |                          |     |     |     |           |                           |     |     |     |           |                           |     |     |     |           |                            |     |     |     |           |                           |     |     |     |           |                           |     |     |     |           |                           |     |     |     |           |                           |     |     |     |           |                           |     |     |     |           |  |
| CTAGCGGGTCGCACTTCCAGTTCTA  | 253                                                                                                                                                                                                                                                                                                                                                                                                                                                                                                                                                                                                                                                                                                                                                                                                                                                                                                                                                                                                                                                                                                                                                                                                                                                                                                                                                                                                  | 211                   | 598                          | Antisense           |                              |                     |                           |     |     |     |           |                           |     |     |     |           |                          |     |     |     |           |                           |     |     |     |           |                           |     |     |     |           |                            |     |     |     |           |                           |     |     |     |           |                           |     |     |     |           |                           |     |     |     |           |                           |     |     |     |           |                           |     |     |     |           |  |
| CACCGTGGACGGCACCAAGTATTGG  | 295                                                                                                                                                                                                                                                                                                                                                                                                                                                                                                                                                                                                                                                                                                                                                                                                                                                                                                                                                                                                                                                                                                                                                                                                                                                                                                                                                                                                  | 125                   | 695                          | Antisense           |                              |                     |                           |     |     |     |           |                           |     |     |     |           |                          |     |     |     |           |                           |     |     |     |           |                           |     |     |     |           |                            |     |     |     |           |                           |     |     |     |           |                           |     |     |     |           |                           |     |     |     |           |                           |     |     |     |           |                           |     |     |     |           |  |
| GTGGACGGCACCAAGTATTGGATCG  | 691                                                                                                                                                                                                                                                                                                                                                                                                                                                                                                                                                                                                                                                                                                                                                                                                                                                                                                                                                                                                                                                                                                                                                                                                                                                                                                                                                                                                  | 475                   | 699                          | Antisense           |                              |                     |                           |     |     |     |           |                           |     |     |     |           |                          |     |     |     |           |                           |     |     |     |           |                           |     |     |     |           |                            |     |     |     |           |                           |     |     |     |           |                           |     |     |     |           |                           |     |     |     |           |                           |     |     |     |           |                           |     |     |     |           |  |
| GTGAGAAGGGATACATCCGCATGAA  | 414                                                                                                                                                                                                                                                                                                                                                                                                                                                                                                                                                                                                                                                                                                                                                                                                                                                                                                                                                                                                                                                                                                                                                                                                                                                                                                                                                                                                  | 479                   | 751                          | Antisense           |                              |                     |                           |     |     |     |           |                           |     |     |     |           |                          |     |     |     |           |                           |     |     |     |           |                           |     |     |     |           |                            |     |     |     |           |                           |     |     |     |           |                           |     |     |     |           |                           |     |     |     |           |                           |     |     |     |           |                           |     |     |     |           |  |
| GGATACATCCGCATGAAGCGCGATG  | 393                                                                                                                                                                                                                                                                                                                                                                                                                                                                                                                                                                                                                                                                                                                                                                                                                                                                                                                                                                                                                                                                                                                                                                                                                                                                                                                                                                                                  | 519                   | 759                          | Antisense           |                              |                     |                           |     |     |     |           |                           |     |     |     |           |                          |     |     |     |           |                           |     |     |     |           |                           |     |     |     |           |                            |     |     |     |           |                           |     |     |     |           |                           |     |     |     |           |                           |     |     |     |           |                           |     |     |     |           |                           |     |     |     |           |  |
| <b>Sequence Source</b>     | Affymetrix Proprietary Database                                                                                                                                                                                                                                                                                                                                                                                                                                                                                                                                                                                                                                                                                                                                                                                                                                                                                                                                                                                                                                                                                                                                                                                                                                                                                                                                                                      |                       |                              |                     |                              |                     |                           |     |     |     |           |                           |     |     |     |           |                          |     |     |     |           |                           |     |     |     |           |                           |     |     |     |           |                            |     |     |     |           |                           |     |     |     |           |                           |     |     |     |           |                           |     |     |     |           |                           |     |     |     |           |                           |     |     |     |           |  |

## 2-nuclear transcription factor SLN1 [Hordeum vulgare]

Details for BARLEY1:CONTIG3135\_AT  
[Full Screen](#)

|                                    |                                                                       |
|------------------------------------|-----------------------------------------------------------------------|
| <b>NetAffx Links</b>               | <a href="#">Cluster Members</a><br><a href="#">Consensus/Exemplar</a> |
| <b>GeneChip Array Information</b>  |                                                                       |
| <b>Probe Set ID</b>                | Contig3135_at                                                         |
| <b>GeneChip Array</b>              | Affymetrix Barley Genome Array                                        |
| <b>Organism Common Name</b>        | Barley                                                                |
| <b>Probe Design Information</b>    |                                                                       |
| <b>Transcript ID(Array Design)</b> | Contig3135                                                            |
| <b>Sequence Type</b>               | Exemplar sequence                                                     |

|                                                             |                                                                                                                                                                                                                                                                                                                                                                                                                                                                                                                                                                                                                                                                    |                    |                        |                                     |                            |
|-------------------------------------------------------------|--------------------------------------------------------------------------------------------------------------------------------------------------------------------------------------------------------------------------------------------------------------------------------------------------------------------------------------------------------------------------------------------------------------------------------------------------------------------------------------------------------------------------------------------------------------------------------------------------------------------------------------------------------------------|--------------------|------------------------|-------------------------------------|----------------------------|
| <b>Representative Public ID</b>                             | Contig3135 <a href="#">NCBI</a>                                                                                                                                                                                                                                                                                                                                                                                                                                                                                                                                                                                                                                    |                    |                        |                                     |                            |
| <b>Target Description</b>                                   | BEST BLASTX NR: 11/04/02 AAL66734.1 6e-88 nuclear transcription factor SLN1 [Hordeum vulgare]                                                                                                                                                                                                                                                                                                                                                                                                                                                                                                                                                                      |                    |                        |                                     |                            |
| <b>Annotation Method Description</b>                        |                                                                                                                                                                                                                                                                                                                                                                                                                                                                                                                                                                                                                                                                    |                    |                        |                                     |                            |
| <b>Annotation Description</b>                               | Contig3135_at was annotated using the Design Representative Id based pipeline to a UniGene identifier using 1 transcript(s).                                                                                                                                                                                                                                                                                                                                                                                                                                                                                                                                       |                    |                        |                                     |                            |
| <b>Annotation Grade</b>                                     | This is a grade R annotation.                                                                                                                                                                                                                                                                                                                                                                                                                                                                                                                                                                                                                                      |                    |                        |                                     |                            |
| <b>Annotation Transcript Cluster (# of Matching Probes)</b> | Contig3135                                                                                                                                                                                                                                                                                                                                                                                                                                                                                                                                                                                                                                                         |                    |                        |                                     |                            |
| <b>Transcript Assignments</b>                               | <b>Representative Transcript</b>                                                                                                                                                                                                                                                                                                                                                                                                                                                                                                                                                                                                                                   | <b>Description</b> | <b>Matching Probes</b> | <b>Related Probesets by Grade</b>   |                            |
|                                                             | Contig3135                                                                                                                                                                                                                                                                                                                                                                                                                                                                                                                                                                                                                                                         |                    |                        | None                                |                            |
| <b>Annotation Notes</b>                                     | There are no noteworthy cross hybridizing mRNAs found for this probe set.                                                                                                                                                                                                                                                                                                                                                                                                                                                                                                                                                                                          |                    |                        |                                     |                            |
| <b>Sequence</b>                                             |                                                                                                                                                                                                                                                                                                                                                                                                                                                                                                                                                                                                                                                                    |                    |                        |                                     |                            |
| <b>Target Sequence</b>                                      | <pre>&gt;BARLEY1:CONTIG3135_AT ggctccaatgcctacaagcaggcgagcacgctgctggccctcttcgccggcgggcga cggg tacaaggtggaagagaaggaaggggtgcctgactctcgggtggcacacgcgcccgct gatac gccacttccgcatggcgctcgcgcgcccgtgatcgcgagtttgaacgctgtaag taga catcgtgagagcatggagcgtacgacacaacccccggccgcccggccccggct ctcc ggcgcacgcacacgcacttgaagaagaagaagatgaagaagaagctaaatgtcagt gata cgctgaattgcagcgaccggctaggatcgatcgggttaccactctacggtttggtt ctgc gtccggcgtgaagacatggacacgaccaactccgaccagaccgcccggcatgtaatg taat ccctccttcggtcccagttcaccatcacccgtaaaactccttattaagccctatta ctat tattattatgtttaaagtctattactattgctatgtgtaattcctccaatcgctc atat tgaaataagcacgggcccggactttgtagcagctgctccattgagaatt</pre> |                    |                        |                                     |                            |
|                                                             | <a href="#">BLASTn GenBank NR</a>                                                                                                                                                                                                                                                                                                                                                                                                                                                                                                                                                                                                                                  |                    |                        |                                     |                            |
| <b>Probe Info</b>                                           | <b>Probe Sequence(5'-3')</b>                                                                                                                                                                                                                                                                                                                                                                                                                                                                                                                                                                                                                                       | <b>Probe X</b>     | <b>Probe Y</b>         | <b>Probe Interrogation Position</b> | <b>Target Strandedness</b> |
|                                                             | GGCTCCAATGCCTACAAGCAGGCGA                                                                                                                                                                                                                                                                                                                                                                                                                                                                                                                                                                                                                                          | 55                 | 545                    | 1866                                | Antisense                  |
|                                                             | AGAGAAGGAAGGGTGCCTGACTCTC                                                                                                                                                                                                                                                                                                                                                                                                                                                                                                                                                                                                                                          | 277                | 93                     | 1937                                | Antisense                  |
|                                                             | GCCGTGATCGCGAGTTTTGAACGCT                                                                                                                                                                                                                                                                                                                                                                                                                                                                                                                                                                                                                                          | 671                | 287                    | 2012                                | Antisense                  |
|                                                             | TGAGAGCATGGAGCGCTACGACACA                                                                                                                                                                                                                                                                                                                                                                                                                                                                                                                                                                                                                                          | 592                | 581                    | 2051                                | Antisense                  |
|                                                             | GCACGCACACGCCTTGAAGAAGAA                                                                                                                                                                                                                                                                                                                                                                                                                                                                                                                                                                                                                                           | 552                | 325                    | 2109                                | Antisense                  |
|                                                             | CTGAATTGCAGCGACCGCTAGGAT                                                                                                                                                                                                                                                                                                                                                                                                                                                                                                                                                                                                                                           | 618                | 251                    | 2168                                | Antisense                  |
|                                                             | ACCACTCTACGGTTTGGTTCTGCGT                                                                                                                                                                                                                                                                                                                                                                                                                                                                                                                                                                                                                                          | 392                | 111                    | 2203                                | Antisense                  |
|                                                             | TCTGCGTCCGGCGTGAAGACATGGA                                                                                                                                                                                                                                                                                                                                                                                                                                                                                                                                                                                                                                          | 8                  | 617                    | 2221                                | Antisense                  |
|                                                             | AAATGCTATTACTATTGCTATGTG                                                                                                                                                                                                                                                                                                                                                                                                                                                                                                                                                                                                                                           | 622                | 149                    | 2359                                | Antisense                  |
|                                                             | ACGGCCCGGACTTTGTTAGCAGCTG                                                                                                                                                                                                                                                                                                                                                                                                                                                                                                                                                                                                                                          | 200                | 127                    | 2416                                | Antisense                  |
|                                                             | GTTAGCAGCTGCTCCATTGAGAATT                                                                                                                                                                                                                                                                                                                                                                                                                                                                                                                                                                                                                                          | 318                | 437                    | 2430                                | Antisense                  |

**Sequence Source** Affymetrix Proprietary Database

### 3- putative cytochrome P450 [Oryza sativa (japonica cultivar-group)]

Details for BARLEY1:HVSMEA0013F14R2\_AT  
[Full Screen](#)

|                                                             |                                                                                                                                                                                                                                                                                                                                                                                                                                                              |                    |                        |                                   |
|-------------------------------------------------------------|--------------------------------------------------------------------------------------------------------------------------------------------------------------------------------------------------------------------------------------------------------------------------------------------------------------------------------------------------------------------------------------------------------------------------------------------------------------|--------------------|------------------------|-----------------------------------|
| <b>NetAffx Links</b>                                        | <a href="#">Cluster Members</a><br><a href="#">Consensus/Exemplar</a>                                                                                                                                                                                                                                                                                                                                                                                        |                    |                        |                                   |
| <b>GeneChip Array Information</b>                           |                                                                                                                                                                                                                                                                                                                                                                                                                                                              |                    |                        |                                   |
| <b>Probe Set ID</b>                                         | HVSMEa0013F14r2_at                                                                                                                                                                                                                                                                                                                                                                                                                                           |                    |                        |                                   |
| <b>GeneChip Array</b>                                       | Affymetrix Barley Genome Array                                                                                                                                                                                                                                                                                                                                                                                                                               |                    |                        |                                   |
| <b>Organism Common Name</b>                                 | Barley                                                                                                                                                                                                                                                                                                                                                                                                                                                       |                    |                        |                                   |
| <b>Probe Design Information</b>                             |                                                                                                                                                                                                                                                                                                                                                                                                                                                              |                    |                        |                                   |
| <b>Transcript ID (Array Design)</b>                         | HVSMEa0013F14r2                                                                                                                                                                                                                                                                                                                                                                                                                                              |                    |                        |                                   |
| <b>Sequence Type</b>                                        | Exemplar sequence                                                                                                                                                                                                                                                                                                                                                                                                                                            |                    |                        |                                   |
| <b>Representative Public ID</b>                             | HVSMEa0013F14r2 <a href="#">NCBI</a>                                                                                                                                                                                                                                                                                                                                                                                                                         |                    |                        |                                   |
| <b>Target Description</b>                                   | BEST BLASTX NR: 11/08/02 BAB19089.1 2e-80 (AP002744) putative cytochrome P450 [Oryza sativa (japonica cultivar-group)]                                                                                                                                                                                                                                                                                                                                       |                    |                        |                                   |
| <b>Annotation Method Description</b>                        |                                                                                                                                                                                                                                                                                                                                                                                                                                                              |                    |                        |                                   |
| <b>Annotation Description</b>                               | HVSMEa0013F14r2_at was annotated using the Design Representative Id based pipeline to a UniGene identifier using 1 transcript(s).                                                                                                                                                                                                                                                                                                                            |                    |                        |                                   |
| <b>Annotation Grade</b>                                     | This is a grade R annotation.                                                                                                                                                                                                                                                                                                                                                                                                                                |                    |                        |                                   |
| <b>Annotation Transcript Cluster (# of Matching Probes)</b> | HVSMEa0013F14r2                                                                                                                                                                                                                                                                                                                                                                                                                                              |                    |                        |                                   |
| <b>Transcript Assignments</b>                               | <b>Representative Transcript</b>                                                                                                                                                                                                                                                                                                                                                                                                                             | <b>Description</b> | <b>Matching Probes</b> | <b>Related Probesets by Grade</b> |
|                                                             | HVSMEa0013F14r2                                                                                                                                                                                                                                                                                                                                                                                                                                              |                    |                        | None                              |
| <b>Annotation Notes</b>                                     | There are no noteworthy cross hybridizing mRNAs found for this probe set.                                                                                                                                                                                                                                                                                                                                                                                    |                    |                        |                                   |
| <b>Sequence</b>                                             |                                                                                                                                                                                                                                                                                                                                                                                                                                                              |                    |                        |                                   |
| <b>Target Sequence</b>                                      | >BARLEY1:HVSMEA0013F14R2_AT<br>gtatgaagttctccggtgtaccaccggctaccgcattcaccggaaaacgtaca<br>agga<br>gatcgagggtcgggggcatcacgtaccagccggcgtgatgt <b>tcgagatgccggtgc</b><br><b>tgta</b><br>catccaccatgacacgggcatttgggga <b>gaagatgcgaccgattca</b> agccggaca<br>ggtt<br>cgccgagggggtctccaaggcgtccaaggaccggccgcttcttcccgttcggtt<br>gggg<br>gccacggatctgcatcgccagaacttcgcgttgcttgaggccaagatggccttgt<br>gcat<br>gatccttcagcgctttgagtttgagctcgcgccgctcgtacgccatacaccgcata |                    |                        |                                   |

|                           | <pre>gcgt gatgatggttgcgtcccatgcatggtgctcagatcaggcttcacgctatctcttctcct agta tcgtacgcatggcattcacttcctatgtgatatgcatgtagtctttaattaccatc cggc t</pre>                                                                                                                                                                                                                                                                                                                                                                                                                                                                                                                                                                                                                                                                                                                                                                                                                                                                                                                                                                                                                                                                                                                                                                                                                                                                                                                                                                  |                       |         |                              |                              |                     |                           |     |     |     |           |                            |     |     |     |           |                            |     |     |     |           |                           |     |     |     |           |                          |     |    |     |           |                            |     |     |     |           |                           |     |     |     |           |                           |     |     |     |           |                          |     |     |     |           |                           |     |     |     |           |                           |     |     |     |           |
|---------------------------|-------------------------------------------------------------------------------------------------------------------------------------------------------------------------------------------------------------------------------------------------------------------------------------------------------------------------------------------------------------------------------------------------------------------------------------------------------------------------------------------------------------------------------------------------------------------------------------------------------------------------------------------------------------------------------------------------------------------------------------------------------------------------------------------------------------------------------------------------------------------------------------------------------------------------------------------------------------------------------------------------------------------------------------------------------------------------------------------------------------------------------------------------------------------------------------------------------------------------------------------------------------------------------------------------------------------------------------------------------------------------------------------------------------------------------------------------------------------------------------------------------------------|-----------------------|---------|------------------------------|------------------------------|---------------------|---------------------------|-----|-----|-----|-----------|----------------------------|-----|-----|-----|-----------|----------------------------|-----|-----|-----|-----------|---------------------------|-----|-----|-----|-----------|--------------------------|-----|----|-----|-----------|----------------------------|-----|-----|-----|-----------|---------------------------|-----|-----|-----|-----------|---------------------------|-----|-----|-----|-----------|--------------------------|-----|-----|-----|-----------|---------------------------|-----|-----|-----|-----------|---------------------------|-----|-----|-----|-----------|
|                           | <a href="#">BLASTn GenBank NR</a>                                                                                                                                                                                                                                                                                                                                                                                                                                                                                                                                                                                                                                                                                                                                                                                                                                                                                                                                                                                                                                                                                                                                                                                                                                                                                                                                                                                                                                                                                 |                       |         |                              |                              |                     |                           |     |     |     |           |                            |     |     |     |           |                            |     |     |     |           |                           |     |     |     |           |                          |     |    |     |           |                            |     |     |     |           |                           |     |     |     |           |                           |     |     |     |           |                          |     |     |     |           |                           |     |     |     |           |                           |     |     |     |           |
| <b>Probe Info</b>         | <table border="1"> <thead> <tr> <th style="background-color: #d9e1f2;">Probe Sequence(5'-3')</th> <th style="background-color: #d9e1f2;">Probe X</th> <th style="background-color: #d9e1f2;">Probe Y</th> <th style="background-color: #d9e1f2;">Probe Interrogation Position</th> <th style="background-color: #d9e1f2;">Target Strandedness</th> </tr> </thead> <tbody> <tr><td>GTATGAAGTTCTCCGGTTGTACCCA</td><td>551</td><td>447</td><td>127</td><td>Antisense</td></tr> <tr><td>TACCCAGCCGGCGTGATGTTTCGAGA</td><td>351</td><td>647</td><td>209</td><td>Antisense</td></tr> <tr><td>GATGTTTCGAGATGCCGGTGCTGTAC</td><td>282</td><td>403</td><td>223</td><td>Antisense</td></tr> <tr><td>TGTACATCCACCATGACACGGGCAT</td><td>686</td><td>563</td><td>243</td><td>Antisense</td></tr> <tr><td>AGAAGATGCGCACCATTCAAGCCG</td><td>602</td><td>99</td><td>274</td><td>Antisense</td></tr> <tr><td>GATTCGAAGCCGGACAGGTTCCGCCA</td><td>610</td><td>421</td><td>288</td><td>Antisense</td></tr> <tr><td>GATCCTTCAGCGCTTTGAGTTTGAG</td><td>136</td><td>409</td><td>427</td><td>Antisense</td></tr> <tr><td>TGCATGGTGCTCAGATCAGGCTTCA</td><td>441</td><td>591</td><td>504</td><td>Antisense</td></tr> <tr><td>TATCTCTTCTAGTATCGTACGCAT</td><td>304</td><td>659</td><td>532</td><td>Antisense</td></tr> <tr><td>TACGCATGGCATTCACTTCCTATGT</td><td>554</td><td>645</td><td>550</td><td>Antisense</td></tr> <tr><td>TGTAGTCTTTAATTACCATCCGGTT</td><td>585</td><td>569</td><td>583</td><td>Antisense</td></tr> </tbody> </table> | Probe Sequence(5'-3') | Probe X | Probe Y                      | Probe Interrogation Position | Target Strandedness | GTATGAAGTTCTCCGGTTGTACCCA | 551 | 447 | 127 | Antisense | TACCCAGCCGGCGTGATGTTTCGAGA | 351 | 647 | 209 | Antisense | GATGTTTCGAGATGCCGGTGCTGTAC | 282 | 403 | 223 | Antisense | TGTACATCCACCATGACACGGGCAT | 686 | 563 | 243 | Antisense | AGAAGATGCGCACCATTCAAGCCG | 602 | 99 | 274 | Antisense | GATTCGAAGCCGGACAGGTTCCGCCA | 610 | 421 | 288 | Antisense | GATCCTTCAGCGCTTTGAGTTTGAG | 136 | 409 | 427 | Antisense | TGCATGGTGCTCAGATCAGGCTTCA | 441 | 591 | 504 | Antisense | TATCTCTTCTAGTATCGTACGCAT | 304 | 659 | 532 | Antisense | TACGCATGGCATTCACTTCCTATGT | 554 | 645 | 550 | Antisense | TGTAGTCTTTAATTACCATCCGGTT | 585 | 569 | 583 | Antisense |
|                           | Probe Sequence(5'-3')                                                                                                                                                                                                                                                                                                                                                                                                                                                                                                                                                                                                                                                                                                                                                                                                                                                                                                                                                                                                                                                                                                                                                                                                                                                                                                                                                                                                                                                                                             | Probe X               | Probe Y | Probe Interrogation Position | Target Strandedness          |                     |                           |     |     |     |           |                            |     |     |     |           |                            |     |     |     |           |                           |     |     |     |           |                          |     |    |     |           |                            |     |     |     |           |                           |     |     |     |           |                           |     |     |     |           |                          |     |     |     |           |                           |     |     |     |           |                           |     |     |     |           |
|                           | GTATGAAGTTCTCCGGTTGTACCCA                                                                                                                                                                                                                                                                                                                                                                                                                                                                                                                                                                                                                                                                                                                                                                                                                                                                                                                                                                                                                                                                                                                                                                                                                                                                                                                                                                                                                                                                                         | 551                   | 447     | 127                          | Antisense                    |                     |                           |     |     |     |           |                            |     |     |     |           |                            |     |     |     |           |                           |     |     |     |           |                          |     |    |     |           |                            |     |     |     |           |                           |     |     |     |           |                           |     |     |     |           |                          |     |     |     |           |                           |     |     |     |           |                           |     |     |     |           |
|                           | TACCCAGCCGGCGTGATGTTTCGAGA                                                                                                                                                                                                                                                                                                                                                                                                                                                                                                                                                                                                                                                                                                                                                                                                                                                                                                                                                                                                                                                                                                                                                                                                                                                                                                                                                                                                                                                                                        | 351                   | 647     | 209                          | Antisense                    |                     |                           |     |     |     |           |                            |     |     |     |           |                            |     |     |     |           |                           |     |     |     |           |                          |     |    |     |           |                            |     |     |     |           |                           |     |     |     |           |                           |     |     |     |           |                          |     |     |     |           |                           |     |     |     |           |                           |     |     |     |           |
|                           | GATGTTTCGAGATGCCGGTGCTGTAC                                                                                                                                                                                                                                                                                                                                                                                                                                                                                                                                                                                                                                                                                                                                                                                                                                                                                                                                                                                                                                                                                                                                                                                                                                                                                                                                                                                                                                                                                        | 282                   | 403     | 223                          | Antisense                    |                     |                           |     |     |     |           |                            |     |     |     |           |                            |     |     |     |           |                           |     |     |     |           |                          |     |    |     |           |                            |     |     |     |           |                           |     |     |     |           |                           |     |     |     |           |                          |     |     |     |           |                           |     |     |     |           |                           |     |     |     |           |
|                           | TGTACATCCACCATGACACGGGCAT                                                                                                                                                                                                                                                                                                                                                                                                                                                                                                                                                                                                                                                                                                                                                                                                                                                                                                                                                                                                                                                                                                                                                                                                                                                                                                                                                                                                                                                                                         | 686                   | 563     | 243                          | Antisense                    |                     |                           |     |     |     |           |                            |     |     |     |           |                            |     |     |     |           |                           |     |     |     |           |                          |     |    |     |           |                            |     |     |     |           |                           |     |     |     |           |                           |     |     |     |           |                          |     |     |     |           |                           |     |     |     |           |                           |     |     |     |           |
|                           | AGAAGATGCGCACCATTCAAGCCG                                                                                                                                                                                                                                                                                                                                                                                                                                                                                                                                                                                                                                                                                                                                                                                                                                                                                                                                                                                                                                                                                                                                                                                                                                                                                                                                                                                                                                                                                          | 602                   | 99      | 274                          | Antisense                    |                     |                           |     |     |     |           |                            |     |     |     |           |                            |     |     |     |           |                           |     |     |     |           |                          |     |    |     |           |                            |     |     |     |           |                           |     |     |     |           |                           |     |     |     |           |                          |     |     |     |           |                           |     |     |     |           |                           |     |     |     |           |
|                           | GATTCGAAGCCGGACAGGTTCCGCCA                                                                                                                                                                                                                                                                                                                                                                                                                                                                                                                                                                                                                                                                                                                                                                                                                                                                                                                                                                                                                                                                                                                                                                                                                                                                                                                                                                                                                                                                                        | 610                   | 421     | 288                          | Antisense                    |                     |                           |     |     |     |           |                            |     |     |     |           |                            |     |     |     |           |                           |     |     |     |           |                          |     |    |     |           |                            |     |     |     |           |                           |     |     |     |           |                           |     |     |     |           |                          |     |     |     |           |                           |     |     |     |           |                           |     |     |     |           |
|                           | GATCCTTCAGCGCTTTGAGTTTGAG                                                                                                                                                                                                                                                                                                                                                                                                                                                                                                                                                                                                                                                                                                                                                                                                                                                                                                                                                                                                                                                                                                                                                                                                                                                                                                                                                                                                                                                                                         | 136                   | 409     | 427                          | Antisense                    |                     |                           |     |     |     |           |                            |     |     |     |           |                            |     |     |     |           |                           |     |     |     |           |                          |     |    |     |           |                            |     |     |     |           |                           |     |     |     |           |                           |     |     |     |           |                          |     |     |     |           |                           |     |     |     |           |                           |     |     |     |           |
|                           | TGCATGGTGCTCAGATCAGGCTTCA                                                                                                                                                                                                                                                                                                                                                                                                                                                                                                                                                                                                                                                                                                                                                                                                                                                                                                                                                                                                                                                                                                                                                                                                                                                                                                                                                                                                                                                                                         | 441                   | 591     | 504                          | Antisense                    |                     |                           |     |     |     |           |                            |     |     |     |           |                            |     |     |     |           |                           |     |     |     |           |                          |     |    |     |           |                            |     |     |     |           |                           |     |     |     |           |                           |     |     |     |           |                          |     |     |     |           |                           |     |     |     |           |                           |     |     |     |           |
|                           | TATCTCTTCTAGTATCGTACGCAT                                                                                                                                                                                                                                                                                                                                                                                                                                                                                                                                                                                                                                                                                                                                                                                                                                                                                                                                                                                                                                                                                                                                                                                                                                                                                                                                                                                                                                                                                          | 304                   | 659     | 532                          | Antisense                    |                     |                           |     |     |     |           |                            |     |     |     |           |                            |     |     |     |           |                           |     |     |     |           |                          |     |    |     |           |                            |     |     |     |           |                           |     |     |     |           |                           |     |     |     |           |                          |     |     |     |           |                           |     |     |     |           |                           |     |     |     |           |
| TACGCATGGCATTCACTTCCTATGT | 554                                                                                                                                                                                                                                                                                                                                                                                                                                                                                                                                                                                                                                                                                                                                                                                                                                                                                                                                                                                                                                                                                                                                                                                                                                                                                                                                                                                                                                                                                                               | 645                   | 550     | Antisense                    |                              |                     |                           |     |     |     |           |                            |     |     |     |           |                            |     |     |     |           |                           |     |     |     |           |                          |     |    |     |           |                            |     |     |     |           |                           |     |     |     |           |                           |     |     |     |           |                          |     |     |     |           |                           |     |     |     |           |                           |     |     |     |           |
| TGTAGTCTTTAATTACCATCCGGTT | 585                                                                                                                                                                                                                                                                                                                                                                                                                                                                                                                                                                                                                                                                                                                                                                                                                                                                                                                                                                                                                                                                                                                                                                                                                                                                                                                                                                                                                                                                                                               | 569                   | 583     | Antisense                    |                              |                     |                           |     |     |     |           |                            |     |     |     |           |                            |     |     |     |           |                           |     |     |     |           |                          |     |    |     |           |                            |     |     |     |           |                           |     |     |     |           |                           |     |     |     |           |                          |     |     |     |           |                           |     |     |     |           |                           |     |     |     |           |
| <b>Sequence Source</b>    | Affymetrix Proprietary Database                                                                                                                                                                                                                                                                                                                                                                                                                                                                                                                                                                                                                                                                                                                                                                                                                                                                                                                                                                                                                                                                                                                                                                                                                                                                                                                                                                                                                                                                                   |                       |         |                              |                              |                     |                           |     |     |     |           |                            |     |     |     |           |                            |     |     |     |           |                           |     |     |     |           |                          |     |    |     |           |                            |     |     |     |           |                           |     |     |     |           |                           |     |     |     |           |                          |     |     |     |           |                           |     |     |     |           |                           |     |     |     |           |

#### 4- glutathione-S-transferase Cla47 [Triticum aestivum]

Details for BARLEY1:CONTIG21968\_AT  
[Full Screen](#)

|                                      |                                                                                                                               |
|--------------------------------------|-------------------------------------------------------------------------------------------------------------------------------|
| <b>NetAffx Links</b>                 | <a href="#">Cluster Members</a><br><a href="#">Consensus/Exemplar</a>                                                         |
| <b>GeneChip Array Information</b>    |                                                                                                                               |
| <b>Probe Set ID</b>                  | Contig21968_at                                                                                                                |
| <b>GeneChip Array</b>                | Affymetrix Barley Genome Array                                                                                                |
| <b>Organism Common Name</b>          | Barley                                                                                                                        |
| <b>Probe Design Information</b>      |                                                                                                                               |
| <b>Transcript ID(Array Design)</b>   | Contig21968                                                                                                                   |
| <b>Sequence Type</b>                 | Exemplar sequence                                                                                                             |
| <b>Representative Public ID</b>      | Contig21968 <a href="#">NCBI</a>                                                                                              |
| <b>Target Description</b>            | BEST BLASTX NR: 11/08/02 AAL47687.1 6e-23 glutathione-S-transferase Cla47 [Triticum aestivum]                                 |
| <b>Annotation Method Description</b> |                                                                                                                               |
| <b>Annotation Description</b>        | Contig21968_at was annotated using the Design Representative Id based pipeline to a UniGene identifier using 1 transcript(s). |
| <b>Annotation Grade</b>              | This is a grade R annotation.                                                                                                 |

|                                                             |                                                                                                                                                                                                                                                                                                                                                                                                                                                                           |                    |                        |                                     |                            |
|-------------------------------------------------------------|---------------------------------------------------------------------------------------------------------------------------------------------------------------------------------------------------------------------------------------------------------------------------------------------------------------------------------------------------------------------------------------------------------------------------------------------------------------------------|--------------------|------------------------|-------------------------------------|----------------------------|
| <b>Annotation Transcript Cluster (# of Matching Probes)</b> | Contig21968                                                                                                                                                                                                                                                                                                                                                                                                                                                               |                    |                        |                                     |                            |
| <b>Transcript Assignments</b>                               | <b>Representative Transcript</b>                                                                                                                                                                                                                                                                                                                                                                                                                                          | <b>Description</b> | <b>Matching Probes</b> | <b>Related Probesets by Grade</b>   |                            |
|                                                             | Contig21968                                                                                                                                                                                                                                                                                                                                                                                                                                                               |                    |                        | None                                |                            |
| <b>Annotation Notes</b>                                     | There are no noteworthy cross hybridizing mRNAs found for this probe set.                                                                                                                                                                                                                                                                                                                                                                                                 |                    |                        |                                     |                            |
| <b>Sequence</b>                                             |                                                                                                                                                                                                                                                                                                                                                                                                                                                                           |                    |                        |                                     |                            |
| <b>Target Sequence</b>                                      | <pre>&gt;BARLEY1:CONTIG21968_AT gactccatcgggtacgtggacctcgcgctcgggtgcaacctcttctggatcgaggc gctg cgccacatgttcggcatcaactgtcatcgacgccggcaggacccccgcctggccgc ctgg gctgagagggttcgtggagacggaggctgcaaagaaggcggcgcacccatggaaag catg ttggaggaggccgagaagctgcgggctatgtgggctgcggcggctgc caagtaatt attg gctagctcggag gagcttctttatTTTTcggctcgtcacttctgtttgagggtttg cagt cgtcacctTTTTTTTtacattagcgtcagtcgtcacgttaattattactttatgagt atta gttacctatatgaagtactgtgaatttcactcctctaagttgta</pre> |                    |                        |                                     |                            |
|                                                             | <a href="#">BLASTn GenBank NR</a>                                                                                                                                                                                                                                                                                                                                                                                                                                         |                    |                        |                                     |                            |
| <b>Probe Info</b>                                           | <b>Probe Sequence(5'-3')</b>                                                                                                                                                                                                                                                                                                                                                                                                                                              | <b>Probe X</b>     | <b>Probe Y</b>         | <b>Probe Interrogation Position</b> | <b>Target Strandedness</b> |
|                                                             | GACTCCATCGGGTACGTGGACCTCG                                                                                                                                                                                                                                                                                                                                                                                                                                                 | 202                | 363                    | 101                                 | Antisense                  |
|                                                             | TCGGGTGCAACCTCTTCTGGATCGA                                                                                                                                                                                                                                                                                                                                                                                                                                                 | 71                 | 611                    | 129                                 | Antisense                  |
|                                                             | ACATGTTTCGGCATCACTGTCAFCGA                                                                                                                                                                                                                                                                                                                                                                                                                                                | 350                | 139                    | 165                                 | Antisense                  |
|                                                             | GGCGCCACCCATGGAAAGCATGTTG                                                                                                                                                                                                                                                                                                                                                                                                                                                 | 490                | 547                    | 259                                 | Antisense                  |
|                                                             | GCTGCGGCGGCTGCCAAGTAATTAT                                                                                                                                                                                                                                                                                                                                                                                                                                                 | 227                | 305                    | 314                                 | Antisense                  |
|                                                             | TAATTATTGGCTAGCTCGGAGGAGC                                                                                                                                                                                                                                                                                                                                                                                                                                                 | 709                | 631                    | 332                                 | Antisense                  |
|                                                             | GAGCTTCTTTATTTTCGGTCGTCA                                                                                                                                                                                                                                                                                                                                                                                                                                                  | 508                | 377                    | 353                                 | Antisense                  |
|                                                             | CGGTCGTCACTTCTGTTTGGAGGTT                                                                                                                                                                                                                                                                                                                                                                                                                                                 | 1                  | 255                    | 369                                 | Antisense                  |
|                                                             | TTGGAGGTTTTGCAGTCGTACCTT                                                                                                                                                                                                                                                                                                                                                                                                                                                  | 431                | 707                    | 385                                 | Antisense                  |
|                                                             | CATTAGCGTCAGTCGTACGTTAAT                                                                                                                                                                                                                                                                                                                                                                                                                                                  | 468                | 235                    | 417                                 | Antisense                  |
|                                                             | GTGAATTCCTCCTCTAAGTTGTA                                                                                                                                                                                                                                                                                                                                                                                                                                                   | 515                | 479                    | 480                                 | Antisense                  |
| <b>Sequence Source</b>                                      | Affymetrix Proprietary Database                                                                                                                                                                                                                                                                                                                                                                                                                                           |                    |                        |                                     |                            |

## 5- asparaginase [*Hordeum vulgare*] [*Hordeum vulgare* subsp. *vulgare*]

Details for BARLEY1:CONTIG8739\_AT  
[Full Screen](#)

[NetAffx Cluster Members](#)  
[Links Consensus/Exemplar](#)

### GeneChip Array Information

**Probe Set ID** Contig8739\_at

|                             |                                |
|-----------------------------|--------------------------------|
| <b>GeneChip Array</b>       | Affymetrix Barley Genome Array |
| <b>Organism Common Name</b> | Barley                         |

### Probe Design Information

|                                     |                                                                                                                      |
|-------------------------------------|----------------------------------------------------------------------------------------------------------------------|
| <b>Transcript ID (Array Design)</b> | Contig8739                                                                                                           |
| <b>Sequence Type</b>                | Exemplar sequence                                                                                                    |
| <b>Representative Public ID</b>     | Contig8739 <a href="#">NCBI</a>                                                                                      |
| <b>Target Description</b>           | BEST BLASTX NR: 11/08/02 AAG28786.1 2e-99 (AF308474) asparaginase [Hordeum vulgare] [Hordeum vulgare subsp. vulgare] |

### Annotation Method Description

**Annotation Description** Contig8739\_at was annotated using the Design Representative Id based pipeline to a UniGene identifier using 1 transcript(s).

**Annotation Grade** This is a grade R annotation.

**Annotation Transcript Cluster (# of Matching Probes)** Contig8739

| Transcript Assignments | Representative Transcript | Description | Matching Probes | Related Probesets by Grade |
|------------------------|---------------------------|-------------|-----------------|----------------------------|
|                        | Contig8739                |             |                 | None                       |

**Annotation Notes** There are no noteworthy cross hybridizing mRNAs found for this probe set.

### Sequence

**Target Sequence**

```
>BARLEY1:CONTIG8739_AT
gacgtggccgcgcgtgatggaatacaaggggctgcctctgcaggaggccgtggacttctgc
gtcaaggagcggctcgacgaggggttcgccgggctcatcgccgtgtccggcaccggcgag
gtggcatacgggttcaactgcaccggcatgttcagaggctgcgccaccgaggacggattca
tggaggctcggcatctgggagtgagcgcgcgcaggcagatgtcgctgtggctggcctgaac
tttgaagatagtgcgtgtgtgtgtgtgcatttggccatcctgcgattgccatgtggatct
agtctgagatcctggtttagtagcagtactagtggatcgggagattgggtgatgggtggaat
aattatgatggccgtgaaa
```

| <u>BLASTn GenBank NR</u> |                                 |                |                |                                     |                            |
|--------------------------|---------------------------------|----------------|----------------|-------------------------------------|----------------------------|
|                          | <b>Probe Sequence(5'-3')</b>    | <b>Probe X</b> | <b>Probe Y</b> | <b>Probe Interrogation Position</b> | <b>Target Strandedness</b> |
| <b>Probe Info</b>        | GACGTGGCCCGCGTGATGGAATACA       | 584            | 367            | 881                                 | Antisense                  |
|                          | CGATGTCGCTGTGGCTGGCCTGAAC       | 364            | 263            | 1096                                | Antisense                  |
|                          | GTGGCTGGCCTGAACTTTGAAGATA       | 351            | 493            | 1106                                | Antisense                  |
|                          | CTTTGAAGATAGTGCCTGTGTGTGT       | 79             | 243            | 1120                                | Antisense                  |
|                          | GTGTGTGCATTTGGCCATCCTGCGA       | 128            | 489            | 1141                                | Antisense                  |
|                          | GGCCATCCTGCGATTGCCATGTGGA       | 7              | 551            | 1153                                | Antisense                  |
|                          | ATTGCCATGTGGATCTAGTCTGAGA       | 570            | 7              | 1165                                | Antisense                  |
|                          | TCTAGTCTGAGATCCTGGTTTAGTA       | 690            | 619            | 1178                                | Antisense                  |
|                          | GAGATCCTGGTTTAGTAGCAGTACT       | 631            | 385            | 1186                                | Antisense                  |
|                          | GTAGCAGTACTAGTGGATCGGAGAT       | 635            | 451            | 1200                                | Antisense                  |
|                          | GGAATAATTATGATGGCCGTGAAA        | 335            | 533            | 1236                                | Antisense                  |
| <b>Sequence Source</b>   | Affymetrix Proprietary Database |                |                |                                     |                            |
